# Supplementary material for: Long-Chain Acyl-Carnitines Interfere with Mitochondrial ATP Production Leading to Cardiac Dysfunction in Zebrafish
Source: MDPI journal article supplement (doi:10.3390/ijms22168468), 2021-08-06
Supplement: s1 [file s1]

## Supplementary Table S1

**Supplementary Table S1.** Sequence of primers used for qRT-PCR

|         | Name              | Sequence                 |
|---------|-------------------|--------------------------|
| qRT-PCR | zmfn1a_qRT_for    | TGTGGAGGAGAGAATGGTGA     |
|         | zmfn1a_qRT_rev    | GAGCAGAGGAAGAGGTGAGC     |
|         | zmfn1b_qRT_for    | CTGCCGAACCCGAATACAT      |
|         | zmfn1b_qRT_rev    | GCGATCCACCACCTTCAG       |
|         | zpparg_qRT_for    | AGCTACAGCCCTGAGGAGAA     |
|         | zpparg_qRT_rev    | GAGGAGATTCTGGGCTCAAG     |
|         | zppargc1a_qRT_for | CCTGCTAACTCCCAGCTCAG     |
|         | zppargc1a_qRT_rev | GGGGTTTTCTGTCTTGGCAAC    |
|         | zcox4i1_qRT_for   | GGTCGGAGACGCTAGAATGT     |
|         | zcox4i1_qRT_rev   | AGTAGTCCTCGACCTTCGCA     |
|         | zcox4i2_qRT_for   | AACCAACCGGTGAGTGGAAG     |
|         | zcox4i2_qRT_rev   | TGAGGAGGATACACATAGAGCCT  |
|         | zrpl13_qRT_for    | TCTGGAGGACTGTAAGAGGTATGC |
|         | zrpl13_qRT_rev    | AGACGCACAATCTTGAGAGCAG   |

## Supplementary Figure S1

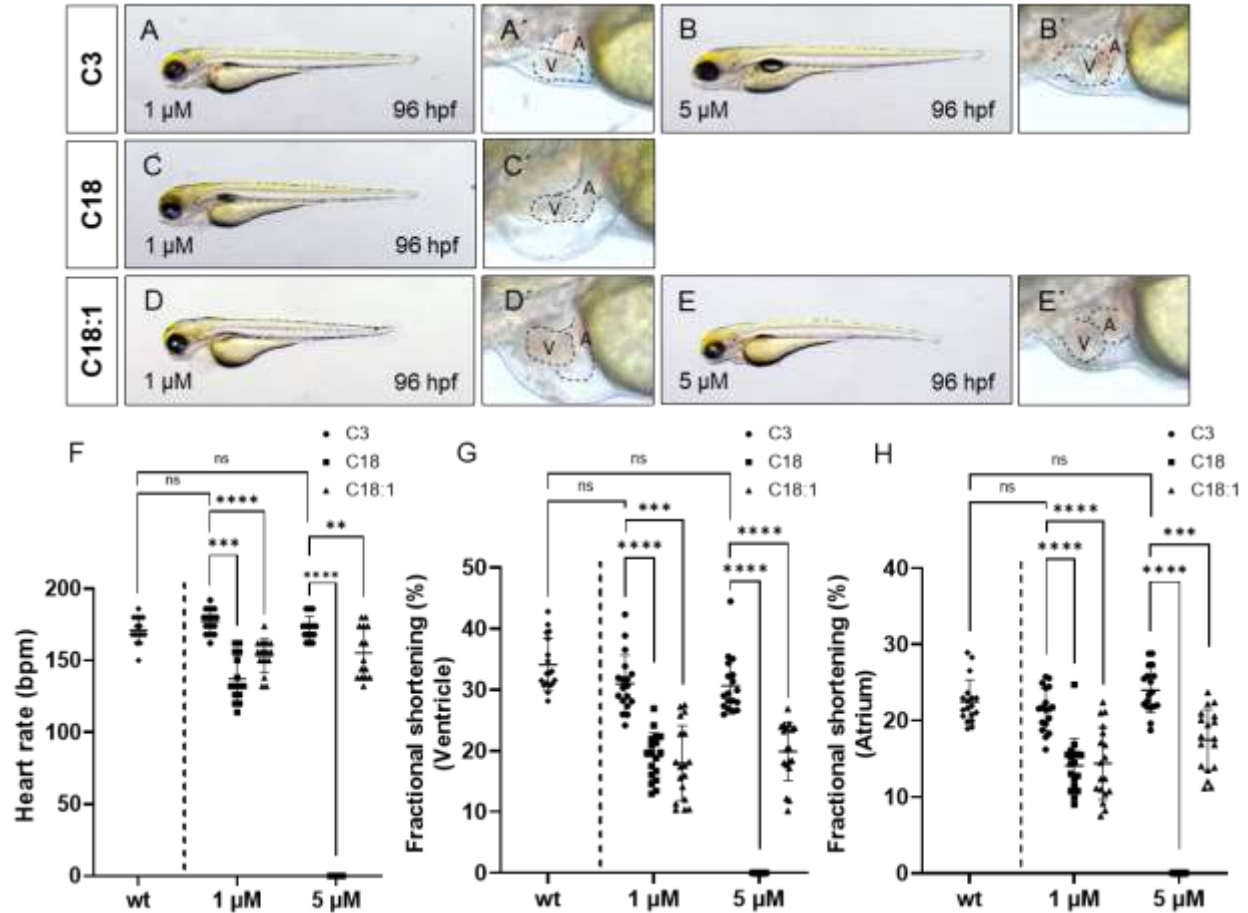

**Supplementary Figure S1.** Phenotype and cardiac function of zebrafish embryos under higher concentration of LCACs. (A-E) Lateral view of embryos after compounds incubation. (A'-E') Magnified view of hearts from B-G. (F) Comparison of heart rate between wild-type and carnitines treated larvae (wt:  $171.2 \pm 9.31$ , bpm ; C3: 1 μM:  $177.2 \pm 8.45$ , 5 μM:  $172.4 \pm 8.32$ ; C18: 1 μM:  $137.2 \pm 16.01$ , 0.5 μM: 0; C18:1: 1 μM:  $153.2 \pm 11.76$ , 0.5 μM:  $155.2 \pm 17.69$ , bpm, SD,  $n=15$ ,  $p < 0.01$ ,  $p < 0.001$ ,  $p < 0.0001$ ) (G, H) Fractional shortening (FS) of heart chambers after compound incubation compared to wt (Ventricular FS; wt:  $33.52 \pm 4.22\%$ ; C3: 1 μM:  $30.98 \pm 4.66\%$ , 5 μM:  $30.05 \pm 4.58\%$ ; C18: 1 μM:  $19.10 \pm 3.82\%$ , 5 μM: 0%; C18:1: 1 μM:  $17.99 \pm 6.09\%$ , 5 μM:  $19.88 \pm 4.82\%$ , SD,  $n=18$ , ns:  $p > 0.05$ ,  $p < 0.001$ ,  $p < 0.0001$ ) (Atrial FS; wt:  $22.46 \pm 2.88\%$ ; C3: 1 μM:  $21.46 \pm 2.77\%$ , 5 μM:  $24.01 \pm 2.97\%$ ; C18: 1 μM:  $14.09 \pm 3.55\%$ , 5 μM: 0%; C18:1: 1 μM:  $14.37 \pm 4.73\%$ , 0.5 μM:  $17.46 \pm 4.01\%$ , SD,  $n=18$ , ns:  $p > 0.05$ ,  $p < 0.001$ ,  $p < 0.0001$ ).

## Supplementary Figure S2

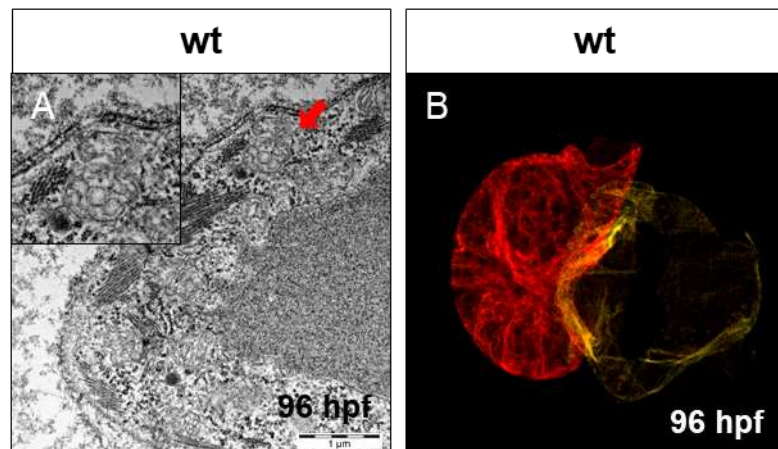

**Supplementary Figure S2.** Electron microscope image (A) and MF20/S46 staining (B) of wild-type embryonic zebrafish heart.
